# Supplementary material
Source: PubMed Central journal article supplement (PMC8152862)
Supplement: sleep_43_6_zsz305_s7.pdf [file sleep_43_6_zsz305_s7.pdf]

## **Snoring: A Source of Noise Pollution and Sleep Apnea Predictor**

Mudiaga Sowho, Francis Sgambati, Michelle Guzman, Hartmut Schneider, Alan Schwartz

Division of Pulmonary and Critical Care Medicine, Johns Hopkins School of Medicine, Baltimore, Maryland, USA.

Corresponding author

Mudiaga Sowho MD, MPH

Johns Hopkins Bayview Medical Center

5501 Hopkins Bayview Circle

JHAAC, Room 4B.34

Baltimore, MD, USA

E-mail: [msowho1@jhmi.edu](mailto:msowho1@jhmi.edu) Phone: +1 410 550 6264

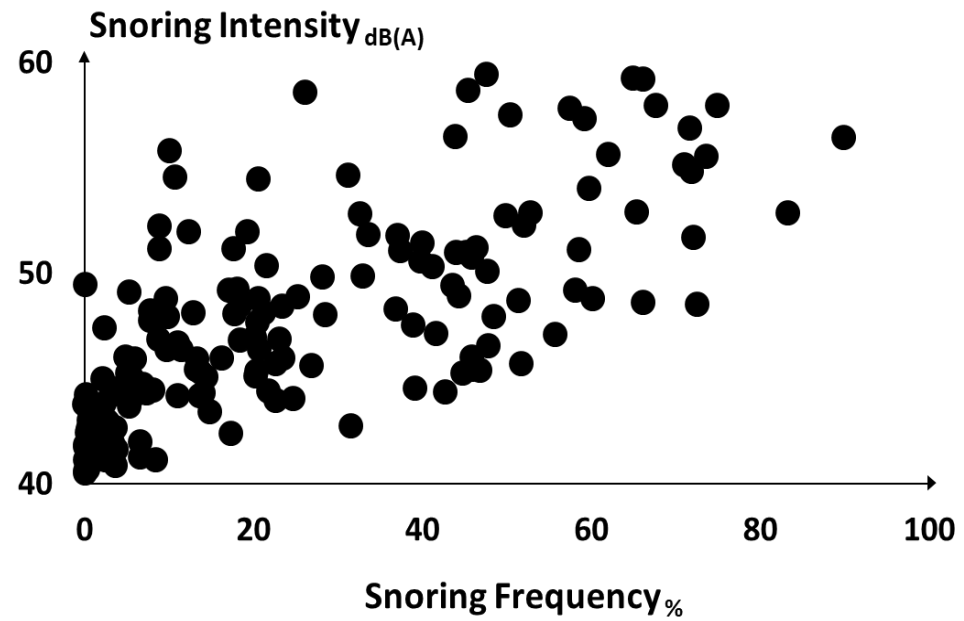

**Figure S1.** A scatter plot of Snoring intensity vs Snoring frequency for the 162 participants in the study population.

**Definitions:** Snoring intensity, participant's mean peak inspiratory sound level in decibels (dB(A)); Snoring frequency the percentage of inspiratory breaths during sleep with sound peaks  $\geq 40$  dB(A). Pearson's correlation coefficient;  $r = 0.71$  and  $p < 0.0001$ .

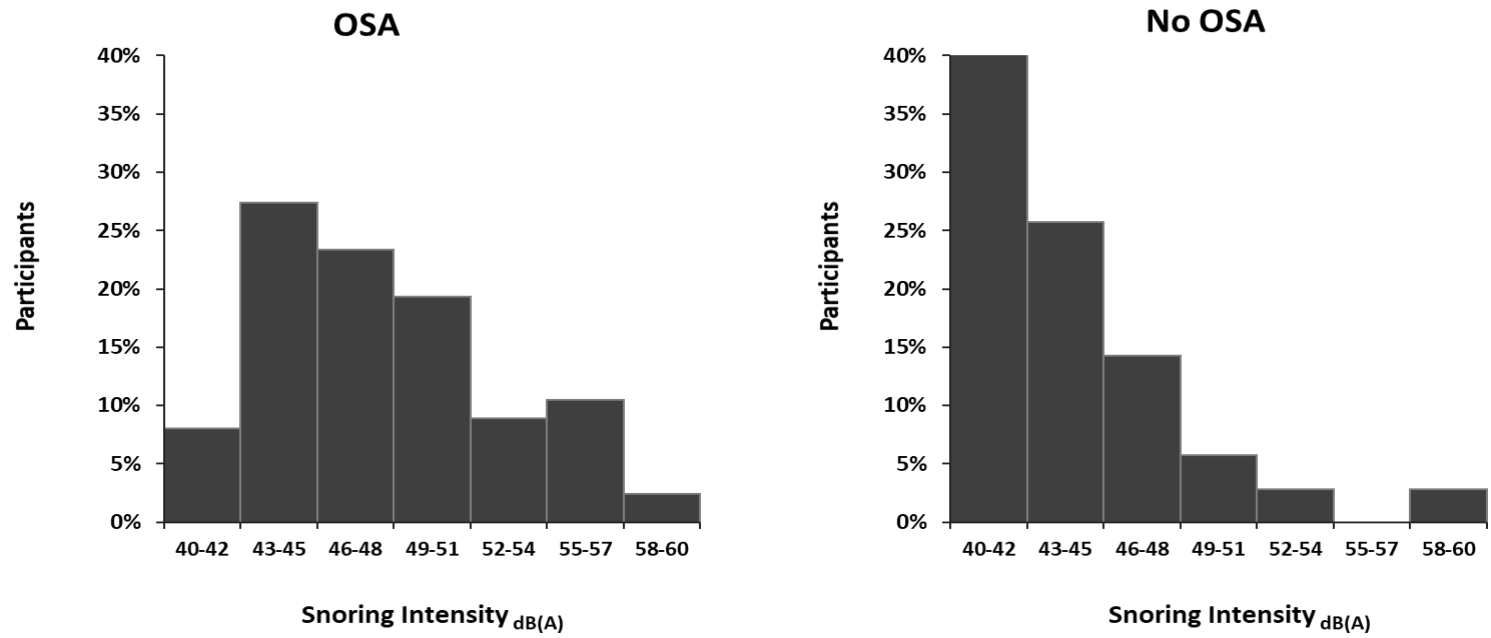

Figure S2a. The distribution of snoring intensity in decibels (dB(A)) for participants with and without obstructive sleep apnea (OSA).

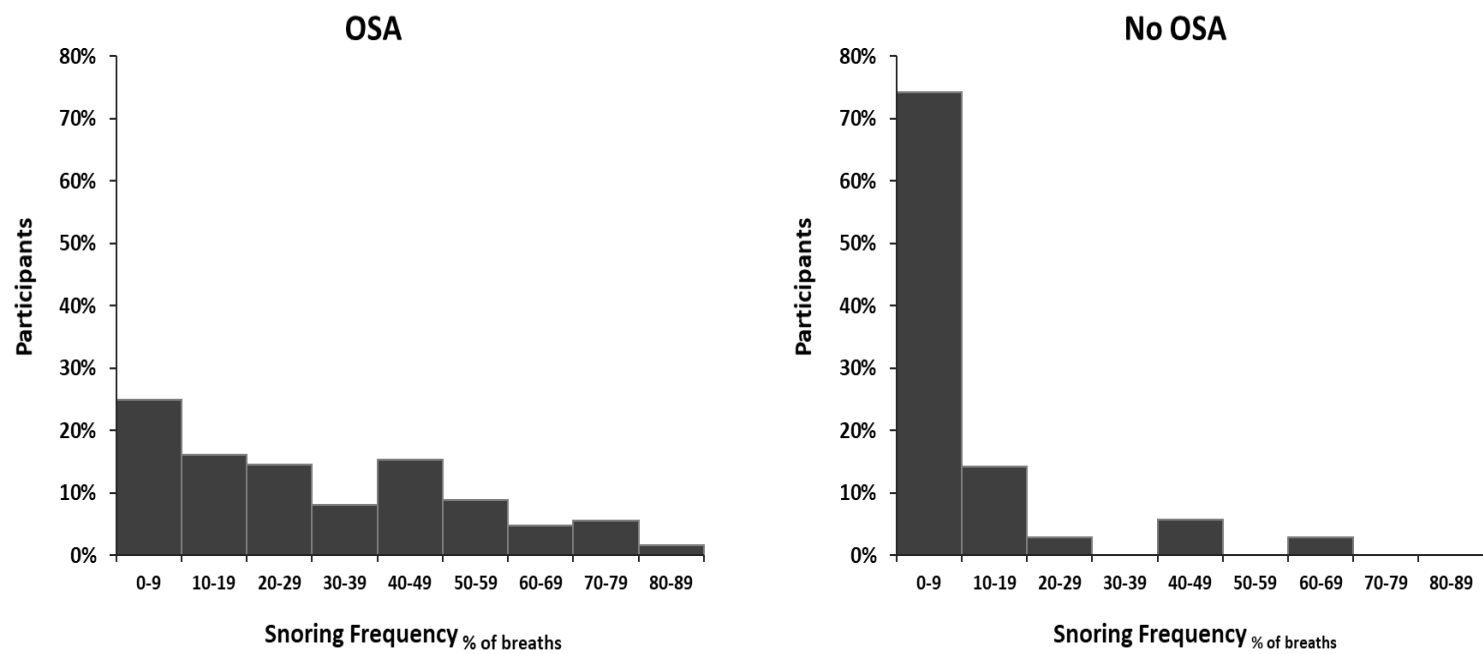

Figure S2b. The distribution of the proportion of snoring breaths for participants with and without obstructive sleep apnea (OSA).

**Table S1a: Association of Snoring Intensity and OSA**

|        | Snoring Intensity |            | Overall |
|--------|-------------------|------------|---------|
|        | < 53 dB(A)        | ≥ 53 dB(A) |         |
| OSA    | 0.743             | 0.955      | 0.772   |
| No OSA | 0.257             | 0.045      | 0.228   |
| Total  | 1                 | 1          | 1       |

**Table S1a.** Shows the proportion of participants with and without OSA in the snoring intensity categories. Fisher's exact test demonstrated that OSA was dependent on snoring intensity with a p value = 0.00.

**Table S1b: Association of Snoring frequency and OSA**

|        | Snoring Frequency |                  | Overall |
|--------|-------------------|------------------|---------|
|        | < 25% of Breaths  | ≥ 25% of Breaths |         |
| OSA    | 0.633             | 0.953            | 0.780   |
| No OSA | 0.337             | 0.047            | 0.220   |
| Total  | 1                 | 1                | 1       |

**Table S1b.** Shows the proportion of participants with and without OSA in the snoring frequency categories. Fisher's exact test demonstrated that OSA was dependent on snoring frequency with a p value = 0.00.

**Table S2: Association of breath-by-breath peak inspiratory sound and inspiratory duty cycle**

| Outcome: Peak inspiratory Sound | <i>B</i> | SE       | p-value |
|---------------------------------|----------|----------|---------|
| <b>Fixed Effects</b>            |          |          |         |
| Intercept                       | 45.81    | 0.55     | <0.0001 |
| $T_i/T_{TOT}$                   | 8.88     | 0.63     | <0.0001 |
| N1                              | -6.46    | 0.23     | <0.0001 |
| N2                              | -2.92    | 0.12     | <0.0001 |
| REM                             | -5.37    | 0.16     | <0.0001 |
| Non-Supine                      | -2.93    | 0.18     | <0.0001 |
| <b>Random Effects</b>           |          |          |         |
| Subject ID                      |          | <i>N</i> |         |
|                                 |          | 77       |         |
| Observations                    |          | 15,597   |         |

**Table S2.** Shows the association between with peak inspiratory sound in decibels (dB(A)) and the severity of upper airway obstruction represented by  $T_i/T_{TOT}$  (inspiratory duty cycle). Randomly selected breaths were analyzed in a linear mixed effects regression model to account for repeated measures within individuals. Sleep stage and position are included in the model as categorical variables with N3 sleep and supine position used as the references. The beta coefficients (*B*), standard errors (SE) and p values are presented.
